# Supplementary material
Source: publisher figshare collection journal article supplement (https://sage.figshare.com/ndownloader/files/13193114)
Supplement: Supplementary file 1 [file 13193114]

## Appendix S1

### Types of Evidence in Study 1

#### Scientific Reports

---

| Cause                                                  | Effect                 |
|--------------------------------------------------------|------------------------|
| Taking a new medication                                | Feeling hungry         |
| Undergoing a newly developed medical procedure         | Temporary hearing loss |
| Implementing an innovative hospital treatment protocol | Being alert            |
| Consuming drinks with the chemical Atroquinine         | Developing a headache  |
| Contracting T4 Angel virus                             | Developing a rash      |
| Exposure to resonance frequencies                      | Hair loss              |

---

#### Eyewitness Testimony

---

|                                |
|--------------------------------|
| Shoplifting                    |
| Robbing a bank                 |
| Trespassing                    |
| Causing a car crash            |
| Verbally harassing a co-worker |
| Starting a forest fire         |

---

#### Social Judgments

---

| Social relationship | Event                             |
|---------------------|-----------------------------------|
| Co- worker          | Buy a new car                     |
| Neighbor            | Moves apartment                   |
| Friend              | Travels to Europe                 |
| Relative            | Likes a movie                     |
| Boss                | Enjoying food at a new restaurant |
| Former classmate    | Learns how to ski                 |

---

#### Consumer Reviews

---

|                   |
|-------------------|
| Laundry detergent |
| Video game        |
| Watch             |
| Camera            |
| Bike              |
| Car               |

---
